# Supplementary material for: Estimated Sustainable Cost-Based Prices for Diabetes Medicines
Source: PubMed Central journal article supplement (PMC10973901; doi:10.1001/jamanetworkopen.2024.3474), 2024-03-27
Supplement: jamanetwopen-e243474-s002.pdf [file jamanetwopen-e243474-s002.pdf]

## Data Sharing Statement

Barber. Estimated Sustainable Cost-Based Prices for Diabetes Medicines. *JAMA Netw Open*. Published March 25, 2024. doi:10.1001/jamanetworkopen.2024.3474

### Data

**Data available:** Yes

**Data types:** Data (not involving human participants)

**How to access data:** Data can be accessed by emailing [melissa.barber@yale.edu](mailto:melissa.barber@yale.edu). We are not able to share the dataset on a website to comply with contract terms with the commercial database.

**When available:** With publication

### Supporting Documents

**Document types:** None

### Additional Information

**Who can access the data:** The data is available to anyone requesting the data.

**Types of analyses:** For any purpose

**Mechanisms of data availability:** With signed data access agreement (that the data will not be posted publicly, again, to comply with the commercial database's terms).
